# Supplementary material for: Synthesis of β-nitrostyrenes in the presence of sulfated zirconia and secondary amines
Source: Royal Society of Chemistry journal article supplement (doi:10.1039/c5ra17168g), 2015-01-01
Supplement: c5ra17168g1.pdf [file c5ra17168g1.pdf]

## Supporting Information

### Synthesis of $\beta$ -nitrostyrenes in the Presence of Sulfated Zirconia and Secondary Amines

R. González-Olvera,<sup>a</sup> B. I. Vergara-Arenas,<sup>b</sup> G. E. Negrón-Silva,<sup>a\*</sup> D. Angeles-Beltrán,<sup>a</sup> L. Lomas-Romero,<sup>b\*</sup> A. Gutiérrez-Carrillo,<sup>b</sup> V. H. Lara,<sup>b</sup> J. A. Morales-Serna.<sup>b</sup>

<sup>a</sup> *Departamento de Ciencias Básicas, Universidad Autónoma Metropolitana, Av. San Pablo No. 180, México D.F., C.P. 02200, México. Fax: +52 55 53189000; Tel: +52 55 5318 9593; E-mail: [gns@correo.azc.uam.mx](mailto:gns@correo.azc.uam.mx) (GENS)*

<sup>b</sup> *Departamento de Química, Universidad Autónoma Metropolitana, Av. San Rafael Atlixco No.186, México D.F., C.P. 09340, México. Fax: +52 55 58044666; Tel: +52 55 58044913; E-mail: [llr@xanum.uam.mx](mailto:llr@xanum.uam.mx) (LLR)*

#### Table of Contents

|                                                                              |     |
|------------------------------------------------------------------------------|-----|
| 1. General methods                                                           | S1  |
| 2. Experimental procedures                                                   | S1  |
| 3. Characterization data                                                     | S5  |
| 4. <sup>1</sup> H and <sup>13</sup> C NMR spectra for compounds <b>2a-2m</b> | S10 |
| 5. References                                                                | S23 |

## 1. General methods

Commercially available reagents and solvents were used as received. Column chromatography was performed on Kiesel gel silica gel 60 (230-400 mesh). Melting points were determined using a Fisher-Johns apparatus and are uncorrected. The NMR spectra were obtained using Bruker Ascend-400 (400 MHz) and Bruker Avance DMX-500 (500 MHz) spectrometers. Chemical shifts ( $\delta$ ) are given in ppm and coupling constants  $J$  are given in hertz (Hz). Mass spectra (MS) were recorded on a GC-MS (Agilent Technologies 6890N, Detector 5973), in the chemical ionization mode using methane UAP grade as ionization gas. Microwave irradiation experiments were performed using a Discover System (CEM Corporation) single-mode microwave with standard sealed microwave glass vials. The nitrogen adsorption-desorption isotherm of sulfated zirconia was obtained at  $-196\text{ }^{\circ}\text{C}$  on Micromeritics ASAP 2020 equipment. Powder X-ray diffraction (XRD) was performed using a Philips X'Pert Instrument with Cu-K $\alpha$  radiation (45kV, 40 mA). Chemical composition of SZ was recorded by an EDX detector on a Zeiss SUPRA VP instrument. All nitrostyrenes **2a-m** are known compounds.

## 2. Experimental procedures

### ***Synthesis and Characterization of Sulfated Zirconia (SZ)***

Sulfated zirconia was synthesized according to our previously reported method.<sup>1</sup> Figure 1 shows XRD plot corresponding to the crystalline zirconia tetragonal as the predominantly phase which is given by reflections in  $2\theta = 30.18^{\circ}$  as well as peaks in  $34.616^{\circ}$ ,  $35.283^{\circ}$ ,  $43.002^{\circ}$ ,  $50.214^{\circ}$ ,  $50.770^{\circ}$ ,  $59.291^{\circ}$ ,  $60.187^{\circ}$ ,  $62.724^{\circ}$ ,  $72.894^{\circ}$ ,  $74.617^{\circ}$  and  $81.768^{\circ}$ . The nitrogen adsorption-desorption isotherm of SZ showed a profile corresponding to type IV of the IUPAC classification, typical for mesoporous materials (Figure 2). The SZ surface area, pore volume, and pore size were  $90.75\text{ m}^2\text{-g}^{-1}$ ,  $0.12\text{ cm}^3\text{-g}^{-1}$ , and  $52.7\text{ \AA}$ , respectively (Table 1). SEM-EDX analysis revealed the presence of sulphur in the zirconia structure, as shown in the emission spectra of Figure 3 and elemental composition (Table 2). Once the sulfated zirconia was recycled is evident the monoclinic phase formation according with the intensification of peak in  $2\theta = 28^{\circ}$  and the peak formation in  $2\theta = 32^{\circ}$  (Figure 4 and 5), even though the sulphur content did not change significantly after the fourth reuse (Table 4).

a) Characterization of synthesised SZ

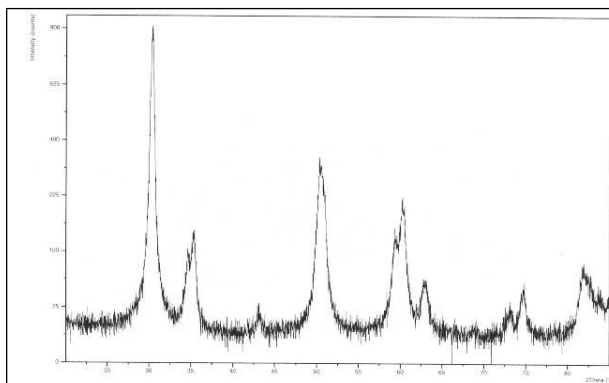

**Figure 1.** XRD pattern of synthesised SZ

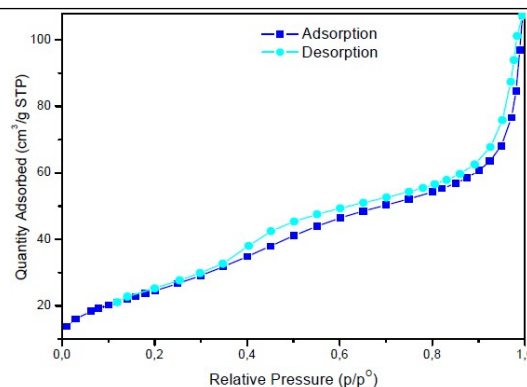

**Figure 2.** Nitrogen adsorption-desorption isotherm of synthesised SZ

**Table 1.** Textural properties of synthesised SZ

| BET Area<br>(m <sup>2</sup> /g) | Pore Volume<br>(cm <sup>3</sup> /g) | Pore Size<br>(Å) |
|---------------------------------|-------------------------------------|------------------|
| 90.75                           | 0.12                                | 52.73            |

**Table 2.** Composition of synthesised SZ

| Element | Weight% |
|---------|---------|
| C       | 11.07   |
| O       | 27.31   |
| S       | 0.32    |
| Zr      | 61.30   |
| Total   | 100.00  |

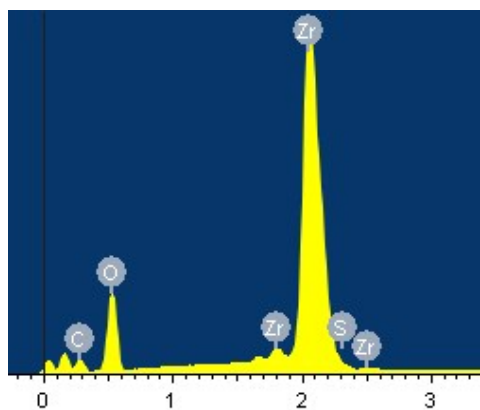

**Figure 3.** SEM-EDX spectra of synthesised SZ

b) Characterization of recovered SZ

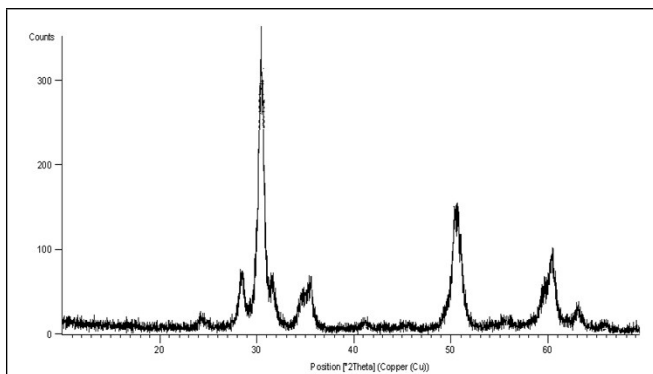

**Figure 4.** XRD pattern of recovered SZ

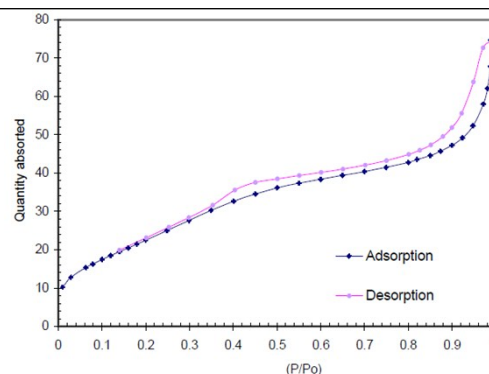

**Figure 5.** Nitrogen adsorption-desorption isotherm of recovered SZ

**Table 3.** Textural properties of recovered SZ

| BET Area<br>(m <sup>2</sup> /g) | Pore Volume<br>(cm <sup>3</sup> /g) | Pore Size<br>(Å) |
|---------------------------------|-------------------------------------|------------------|
| 86.15                           | 0.089                               | 41.62            |

**Table 4.** Composition of recovered SZ

| Element | Weight% |
|---------|---------|
| C       | 23.36   |
| O       | 26.71   |
| S       | 0.37    |
| Zr      | 49.56   |
| Totals  | 100.00  |

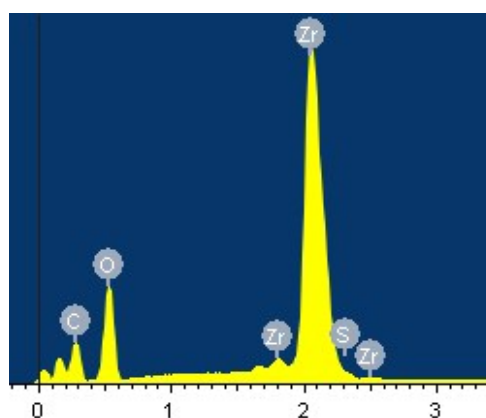

**Figure 6.** SEM-EDX spectra of recovered SZ

**Identification of the Brønsted and Lewis acids sites present in synthesised SZ**

The quantification of acids sites presents in the material was determined by FT-IR (Nicolet 750 Spectrometer). The sample was passed into thin wafers (10 mg cm<sup>-2</sup>) and pre-treated in a quartz cell under vacuum (10<sup>-6</sup>mbar) at 450 °C during 4h. Then the sample was cooled at room temperature and expose to pyridine (1 µL) ( $P_{eq} = 2-3$  mbar). The pyridine excess was removed under vacuum (1 h). Finally, the spectra were recorded at 50-400 °C (Figure 7) and the concentration of Brønsted and Lewis acids sites (Table 5) were calculated by the following equation<sup>2</sup>:

$$n_i = A_i a_c / \varepsilon_i m$$

$n_i$  is the amount of type  $i$  acid sites (µmmol g<sup>-1</sup>)

$A_i$  is the integrated absorbance in cm<sup>-1</sup>

$a_c$  is the cross-sectional area in square centimeter of the wafer

$\varepsilon_i$  is the integrated molar extinction coefficient in cm µmmol<sup>-1</sup>

$m$  is the mass of the sample

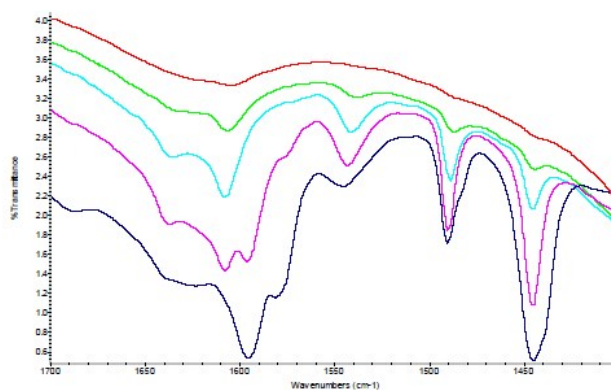

**Fig. 7** FT-IR spectra of SZ after pyridine desorption at different temperatures: a) dark blue 50 °C, purple 100 °C, turquoise 200 °C, green 300 °C and red 400 °C

**Table 5.** The nitrogen adsorption–desorption analysis parameters of materials

| Entry | Parameters                                         | Synthesised SZ | Recovered SZ |
|-------|----------------------------------------------------|----------------|--------------|
| 1     | $S_{BET}$<br>(m <sup>2</sup> ·g <sup>-1</sup> )    | 90.75          | 86.15        |
| 2     | Pore volume<br>(cm <sup>3</sup> ·g <sup>-1</sup> ) | 0.12           | 0.089        |
| 3     | Pore size (Å)                                      | 52.73          | 41.62        |

**General procedure for the synthesis of  $\beta$ -nitrostyrenes 2a-m**

A mixture of SZ (50 mg) and amine (0.1 mmol, 10  $\mu$ L) in dry toluene (1mL) was placed in a microwave tube having a magnetic stirrer. Subsequently, aromatic aldehyde (1 mmol) and nitromethane (3 mmol, 0.15 mL) were added to the mixture, which was heated under microwave irradiation (30 W, 110  $^{\circ}$ C) during 30 minutes. Then, SZ was removed by centrifugation and washed with  $\text{CH}_2\text{Cl}_2$  (5x5mL). The combined organic extracts were evaporated, giving the corresponding  $\beta$ -nitrostyrene, which was purified by column chromatography ( $\text{CH}_2\text{Cl}_2$  or hexanes-EtOAc 1:1) and recrystallization ( $\text{CH}_2\text{Cl}_2$ -hexanes, 1:2).

**3. Characterization data****(E)-1-methyl-4-(2-nitrovinyl)benzene (2a)**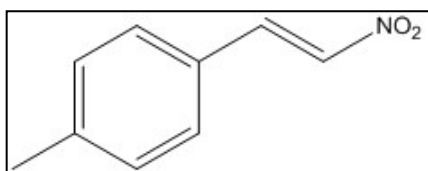

The compound **2a** was prepared from **1a** (0.1 mL, 1 mmol) and nitromethane (0.15 mL, 3mmol) according to General Procedure. Yield: 137 mg (84%); light yellow solid; mp = 99-101 $^{\circ}$ C (Lit.<sup>3</sup> mp=102 $^{\circ}$ C).  $^1\text{H}$  NMR (400 MHz,  $\text{DMSO-}d_6$ ):  $\delta$  = 2.36 (s, 3H,  $\text{CH}_3$ ), 7.29 (d,  $J$  = 8.0 Hz, 2H, ArH), 7.74 (d,  $J$  = 8.0 Hz, 2H, ArH), 8.08 (d,  $J$  = 13.6 Hz, 1H, =CH), 8.17 (d,  $J$  = 13.6 Hz, 1H, =CH).  $^{13}\text{C}$  NMR (100.6 MHz,  $\text{DMSO-}d_6$ ):  $\delta$  = 21.6 ( $\text{CH}_3$ ), 128.0 ( $\text{C}_{\text{ipso}}$ ), 130.28(2xArCH), 130.32 (2xArCH), 137.7 (=CH), 139.8 (=CH), 143.0 ( $\text{C}_{\text{ipso}}$ ). MS (CI) ( $\text{C}_9\text{H}_9\text{NO}_2$ ):  $m/z$  = 204 [ $\text{M}+41$ ] $^+$ , 192 [ $\text{M}+29$ ] $^+$ , 164 [ $\text{M}+1$ ] $^+$ , 149, 121.

**(E)-1-methoxy-3-(2-nitrovinyl)benzene (2b)**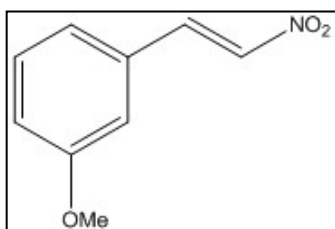

The compound **2b** was prepared from **1b** (136.15 mg, 1 mmol) and nitromethane (0.15 mL, 3mmol) according to General Procedure. Yield: 150 mg (84%); light yellow solid; mp = 91-95 $^{\circ}$ C (Lit.<sup>3</sup> mp=93-94 $^{\circ}$ C).  $^1\text{H}$  NMR (500 MHz,  $\text{DMSO-}d_6$ ):  $\delta$  = 3.81 (s, 3H,  $\text{OCH}_3$ ), 7.08-7.11 (m, 1H, ArH), 7.37-7.42 (m, 2H, ArH), 7.45-7.47 (m, 1H, ArH), 8.09 (d,  $J$  = 13.6 Hz, 1H, =CH), 8.26 (d,  $J$  = 13.6 Hz, 1H, =CH).  $^{13}\text{C}$  NMR (125.7 MHz,  $\text{DMSO-}d_6$ ):  $\delta$  = 55.8 ( $\text{OCH}_3$ ), 114.5 (ArCH), 118.8(ArCH), 123.1 (ArCH), 130.6 (ArCH), 132.1 ( $\text{C}_{\text{ipso}}$ ), 138.8 (=CH), 139.6 (=CH), 160.1 ( $\text{C}_{\text{ipso}}$ ). MS (CI) ( $\text{C}_9\text{H}_9\text{NO}_3$ ):  $m/z$  = 220 [ $\text{M}+41$ ] $^+$ , 208 [ $\text{M}+29$ ] $^+$ , 180 [ $\text{M}+1$ ] $^+$ , 165, 152, 137.

**(E)-1-methoxy-4-(2-nitrovinyl)benzene (2c)**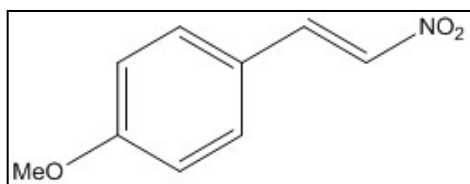

The compound **2c** was prepared from **1c** (136.15 mg, 1 mmol) and nitromethane (0.15 mL, 3mmol) according to General Procedure. Yield: 131 mg (73%); light yellow solid; mp = 84-86°C (Lit.<sup>4</sup> mp = 86-87°C). <sup>1</sup>H NMR (400 MHz, DMSO-*d*<sub>6</sub>): δ = 3.83 (s, 3H, OCH<sub>3</sub>), 7.05 (d, *J* = 8.8 Hz, 2H, ArH), 7.83 (d, *J* = 8.8 Hz, 2H, ArH), 8.09 (d, *J* = 13.5 Hz, 1H, =CH), 8.13 (d, *J* = 13.5 Hz, 1H, =CH). <sup>13</sup>C NMR (100.6 MHz, DMSO-*d*<sub>6</sub>): δ = 56.0 (OCH<sub>3</sub>), 115.3 (2xArCH), 123.2 (C<sub>ipso</sub>), 132.4 (2xArCH), 136.2 (=CH), 139.8 (=CH), 163.0 (C<sub>ipso</sub>). MS (CI) (C<sub>9</sub>H<sub>9</sub>NO<sub>3</sub>): *m/z* = 220 [M+41]<sup>+</sup>, 208 [M+29]<sup>+</sup>, 180 [M+1]<sup>+</sup>, 165, 150, 137.

**(E)-1,2-dimethoxy-4-(2-nitrovinyl)benzene (2d)**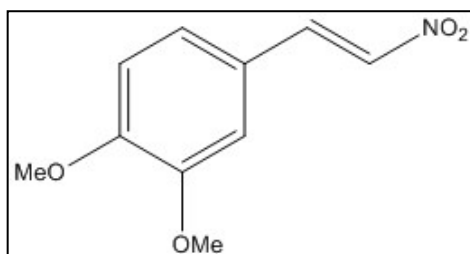

The compound **2d** was prepared from **1d** (166.18 mg, 1 mmol) and nitromethane (0.15 mL, 3mmol) according to General Procedure. Yield: 130 mg (62%); yellow solid; mp = 140-142°C (Lit.<sup>3</sup> mp = 140-141°C). <sup>1</sup>H NMR (400 MHz, DMSO-*d*<sub>6</sub>): δ = 3.82 (s, 3 H, OCH<sub>3</sub>), 3.83 (s, 3 H, OCH<sub>3</sub>), 7.06 (d, *J* = 8.3 Hz, 1H, ArH), 7.43 (dd, *J* = 1.8, 8.3 Hz, 1H, ArH), 7.49 (d, *J* = 1.8 Hz, 1H, ArH), 8.07 (d, *J* = 13.5 Hz, 1H, =CH), 8.21 (d, *J* = 13.5 Hz, 1H, =CH). <sup>13</sup>C NMR (100.6 MHz, DMSO-*d*<sub>6</sub>): δ = 56.2 (OCH<sub>3</sub>), 56.3 (OCH<sub>3</sub>), 111.8 (ArCH), 112.2 (ArCH), 123.4 (C<sub>ipso</sub>), 126.1 (ArCH), 136.4 (=CH), 140.3 (=CH), 149.7 (C<sub>ipso</sub>), 153.0 (C<sub>ipso</sub>). MS (CI) (C<sub>10</sub>H<sub>11</sub>NO<sub>4</sub>): *m/z* = 250 [M+41]<sup>+</sup>, 238 [M+29]<sup>+</sup>, 210 [M+1]<sup>+</sup>, 194, 178, 167.

**(E)-1,2,3-trimethoxy-5-(2-nitrovinyl)benzene (2e)**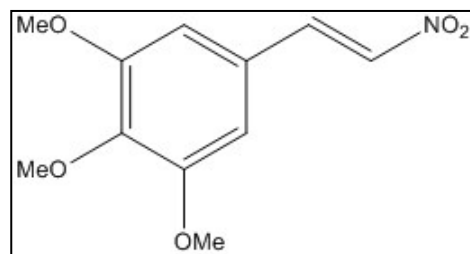

The compound **2e** was prepared from **1e** (196.20 mg, 1 mmol) and nitromethane (0.15 mL, 3mmol) according to General Procedure. Yield: 174 mg (73%), yellow solid; mp = 114-116°C (Lit.<sup>2</sup> mp=120°C). <sup>1</sup>H NMR (400 MHz, DMSO-*d*<sub>6</sub>): δ = 3.73 (s, 3H, OCH<sub>3</sub>), 3.83 (s, 6H, OCH<sub>3</sub>), 7.24 (s, 2H, ArH), 8.06 (d, *J* = 13.5 Hz, 1H, =CH), 8.28 (d, *J* = 13.5, 1H, =CH). <sup>13</sup>C NMR(100.6 MHz, DMSO-*d*<sub>6</sub>): δ = 56.7 (2xOCH<sub>3</sub>), 60.7 (OCH<sub>3</sub>), 108.2 (2xArCH), 126.1 (C<sub>ipso</sub>), 137.9 (=CH), 140.1 (=CH),

141.5 ( $C_{\text{ipso}}$ ), 153.6 ( $2 \times C_{\text{ipso}}$ ). MS (CI) ( $C_{11}H_{13}NO_5$ ):  $m/z = 280$  [ $M+41$ ] $^+$ , 268 [ $M+29$ ] $^+$ , 240 [ $M+1$ ] $^+$ , 224.

**(E)-5-bromo-6-(2-nitrovinyl)benzo[d][1,3]dioxole (2f)**

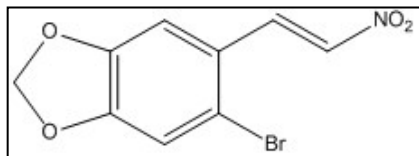

The compound **2f** was prepared from **1f** (229.03 mg, 1 mmol) and nitromethane (0.15 mL, 3mmol) according to General Procedure. Yield: 176 mg (65%); light yellow solid; mp = 156-158°C.  $^1\text{H}$  NMR (400 MHz, DMSO- $d_6$ ):  $\delta = 6.19$  (s, 2H,  $\text{OCH}_2\text{O}$ ), 7.41 (s, 1 H, ArH), 7.67 (s, 1 H, ArH), 8.19 (s, 2H, =CH).  $^{13}\text{C}$  NMR (100.6 MHz, DMSO- $d_6$ ):  $\delta = 103.6$  ( $\text{OCH}_2\text{O}$ ), 108.0 (ArCH), 113.6 (ArCH), 120.1 ( $C_{\text{ipso}}$ ), 123.1 ( $C_{\text{ipso}}$ ), 137.2 (=CH), 138.9 (=CH), 148.6 ( $C_{\text{ipso}}$ ), 152.2 ( $C_{\text{ipso}}$ ). MS (CI) ( $C_9H_6BrNO_4$ ):  $m/z = 314$ , 312 [ $M+41$ ] $^+$ , 302, 300 [ $M+29$ ] $^+$ , 274, 272 [ $M+1$ ] $^+$ , 259, 257, 244, 242, 231, 229, 228, 226, 193, 176, 162.

**(E)-1-(2-nitrovinyl)benzene (2g)**

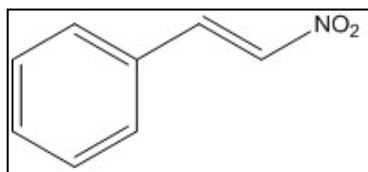

The compound **2g** was prepared from **1g** (0.1 mL, 1 mmol) and nitromethane (0.15 mL, 3mmol) according to General Procedure. Yield: 104 mg (70%); light yellow solid; mp = 55-57°C (Lit.2 mp = 56°C).  $^1\text{H}$  NMR (500 MHz, DMSO- $d_6$ ):  $\delta = 7.46$ -7.50 (m, 2H, ArH), 7.52-7.56 (m, 1H, ArH), 7.84-7.88 (m, 2H, ArH), 8.13 (d,  $J = 13.6$  Hz, 1H, =CH), 8.22 (d,  $J = 13.6$  Hz, 1H, =CH).  $^{13}\text{C}$  NMR (125.7 MHz, DMSO- $d_6$ ):  $\delta = 129.6$  ( $2 \times \text{ArCH}$ ), 130.2 ( $2 \times \text{ArCH}$ ), 130.8 ( $C_{\text{ipso}}$ ), 132.5 (ArCH), 138.5 (=CH), 139.7 (=CH). MS (CI) ( $C_8H_7NO_2$ ):  $m/z = 190$  [ $M+41$ ] $^+$ , 178 [ $M+29$ ] $^+$ , 150 [ $M+1$ ] $^+$ , 135, 107.

**(E)-1-bromo-2-(2-nitrovinyl)benzene (2h)**

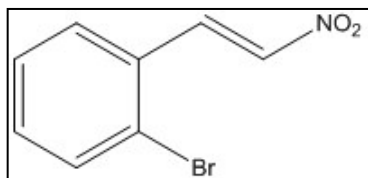

The compound **2h** was prepared from **1h** (0.11 mL, 1 mmol) and nitromethane (0.15 mL, 3mmol) according to General Procedure. Yield: 192 mg (84%); light yellow solid; mp = 82-84°C (Lit.2 mp = 86°C).  $^1\text{H}$  NMR (500 MHz, DMSO- $d_6$ ):  $\delta = 7.44$ -7.51 (m, 2H, ArH), 7.77-7.80 (m, 1H, ArH), 8.00-8.03 (m, 1H, ArH), 8.22 (d,  $J = 13.5$  Hz, 1H, =CH), 8.25 (d,  $J = 13.5$  Hz, 1H, =CH).  $^{13}\text{C}$  NMR (125.7 MHz, DMSO- $d_6$ ):  $\delta = 125.7$  ( $C_{\text{ipso}}$ ), 128.4 (ArCH), 129.5 (ArCH), 129.7 ( $C_{\text{ipso}}$ ), 133.5 ( $2 \times \text{ArCH}$ ), 136.4 (=CH), 140.1 (=CH). MS (CI) ( $C_8H_6BrNO_2$ ):  $m/z = 270$ , 268 [ $M+41$ ] $^+$ , 258, 256 [ $M+29$ ] $^+$ , 230, 228 [ $M+1$ ] $^+$ , 215, 213, 202, 200, 187, 185, 149, 132.



**(E)-1-bromo-4-(2-nitrovinyl)benzene(2i)**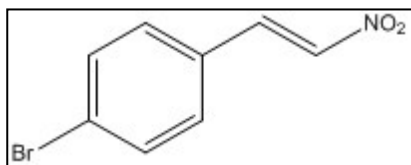

The compound **2i** was prepared from **1i** (185.02 mg, 1 mmol) and nitromethane (0.15 mL, 3mmol) according to General Procedure. Yield: 169mg (74%); yellow solid; mp = 141-143°C (Lit.<sup>5</sup> mp = 148-150°C). <sup>1</sup>H NMR (400 MHz, DMSO-*d*<sub>6</sub>): δ = 7.70 (d, *J* = 8.6 Hz, 2H, ArH), 7.82 (d, *J* = 8.6 Hz, 2H, ArH), 8.12 (d, *J* = 13.6 Hz, 1H, =CH), 8.26 (d, *J* = 13.6 Hz, 1H, =CH). <sup>13</sup>C NMR (100.6 MHz, DMSO-*d*<sub>6</sub>): δ = 126.2 (C<sub>ipso</sub>), 130.1 (C<sub>ipso</sub>), 132.1 (2xArCH), 132.7 (2xArCH), 138.5 (=CH), 139.1 (=CH). MS (CI) (C<sub>8</sub>H<sub>6</sub>BrNO<sub>2</sub>): *m/z* = 270, 268 [M+41]<sup>+</sup>, 258, 256 [M+29]<sup>+</sup>, 230, 228 [M+1]<sup>+</sup>, 215, 213, 187, 185, 150.

**(E)-1-chloro-4-(2-nitrovinyl)benzene (2j)**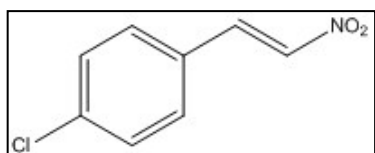

The compound **2j** was prepared from **1j** (140.57 mg, 1 mmol) and nitromethane (0.15 mL, 3mmol) according to General Procedure. Yield: 150 mg (82%); yellow solid; mp = 111-113°C (Lit.<sup>4</sup> mp = 113-114°C). <sup>1</sup>H NMR (500 MHz, DMSO-*d*<sub>6</sub>): δ = 7.55 (d, *J* = 8.5 Hz, 2H, ArH), 7.89 (d, *J* = 8.4 Hz, 2H, ArH), 8.13 (d, *J* = 13.6 Hz, 1H, =CH), 8.26 (d, *J* = 13.6 Hz, 1H, =CH). <sup>13</sup>C NMR (125.7 MHz, DMSO-*d*<sub>6</sub>): δ = 129.7 (2xArCH), 129.8 (C<sub>ipso</sub>), 131.9 (2xArCH), 137.2 (C<sub>ipso</sub>), 138.4 (=CH), 139.0 (=CH). MS (CI) (C<sub>8</sub>H<sub>6</sub>ClNO<sub>2</sub>): *m/z* = 226, 224 [M+41]<sup>+</sup>, 214, 212 [M+29]<sup>+</sup>, 186, 184 [M+1]<sup>+</sup>, 143, 141.

**(E)-1-nitro-2-(2-nitrovinyl)benzene (2k)**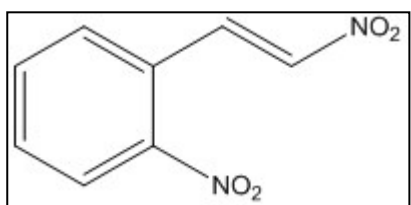

The compound **2k** was prepared from **1k** (151.12 mg, 1 mmol) and nitromethane (0.15 mL, 3mmol) according to General Procedure. Yield: 78 mg (40%); orange solid; mp = 103-105°C (Lit.<sup>6</sup> mp = 103-105°C). <sup>1</sup>H NMR(500 MHz, DMSO-*d*<sub>6</sub>): δ = 7.78 (td, *J* = 1.4, 7.9 Hz, 1H, ArH), 7.86 (td, *J* = 0.8, 7.5 Hz, 1H, ArH), 7.97 (dd, *J* = 1.4, 7.7 Hz, 1H, ArH), 8.12 (d, *J* = 13.5, 1H, =CH), 8.20 (dd, *J* = 1.2, 8.1, 1H, ArH), 8.43 (d, *J* = 13.5 Hz, 1H, =CH). <sup>13</sup>C NMR (125.7 MHz, DMSO-*d*<sub>6</sub>): δ = 125.7 (ArCH), 126.2 (C<sub>ipso</sub>), 130.7 (ArCH), 132.7 (ArCH), 134.7 (ArCH), 135.9 (=CH), 140.9(=CH), 148.9 (C<sub>ipso</sub>). MS (CI) (C<sub>8</sub>H<sub>6</sub>N<sub>2</sub>O<sub>4</sub>): *m/z* = 235 [M+41]<sup>+</sup>, 223 [M+29]<sup>+</sup>, 195 [M+1]<sup>+</sup>, 148, 134, 120, 92.

**(E)-1-nitro-4-(2-nitrovinyl)benzene (2l)**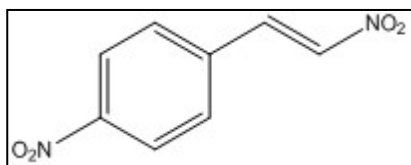

The compound **2l** was prepared from **1l** (151.12 mg, 1 mmol) and nitromethane (0.15 mL, 3mmol) according to General Procedure. Yield: 138 mg (71%); orange solid; mp = 196-198°C (Lit.5 mp = 189-192°C). <sup>1</sup>H NMR (500 MHz, DMSO-*d*<sub>6</sub>): δ = 8.11 (d, *J* = 8.9 Hz, 2H, ArH), 8.23 (d, *J* = 13.7 Hz, 1H, =CH), 8.29 (d, *J* = 8.8 Hz, 2H, ArH), 8.36 (d, *J* = 13.7 Hz, 1H, =CH). <sup>13</sup>C NMR (125.7 MHz, DMSO-*d*<sub>6</sub>): δ = 124.5 (2xArCH), 131.3 (2xArCH), 137.0 (=CH), 137.3 (C<sub>ipso</sub>), 141.4 (=CH), 149.3 (C<sub>ipso</sub>). MS (CI) (C<sub>8</sub>H<sub>6</sub>N<sub>2</sub>O<sub>4</sub>): *m/z* = 235 [M+41]<sup>+</sup>, 223 [M+29]<sup>+</sup>, 195 [M+1]<sup>+</sup>, 165, 152.

**(E)-2-(2-nitrovinyl)furan (2m)**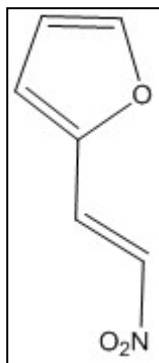

The compound **2m** was prepared from **1m** (0.08 mL, 1 mmol) and nitromethane (0.15 mL, 3mmol) according to General Procedure. Yield: 122 mg (88%); light yellow solid; mp = 71-73°C (Lit.2 mp = 72°C). <sup>1</sup>H NMR (400 MHz, DMSO-*d*<sub>6</sub>): δ = 6.76 (dd, *J* = 1.8, 3.5 Hz, 1H, ArH), 7.29 (d, *J* = 3.5 Hz, 1H, ArH), 7.75 (d, *J* = 13.3 Hz, 1H, =CH), 8.01 (d, *J* = 1.3 Hz, 1H, ArH), 8.02 (d, *J* = 13.3Hz, 1H, =CH). <sup>13</sup>C NMR (100.6 MHz, DMSO-*d*<sub>6</sub>): δ = 114.2 (ArCH), 121.6 (ArCH), 126.6 (=CH), 134.9 (=CH), 146.9 (C<sub>ipso</sub>), 148.6 (ArCH). MS (CI) (C<sub>6</sub>H<sub>5</sub>NO<sub>3</sub>): *m/z* = 180 [M+41]<sup>+</sup>, 168 [M+29]<sup>+</sup>, 140 [M+1]<sup>+</sup>, 97.

**4. <sup>1</sup>H and <sup>13</sup>C NMR spectra for compounds 2a-2m**

**<sup>1</sup>H NMR and <sup>13</sup>C NMR for compound 2a**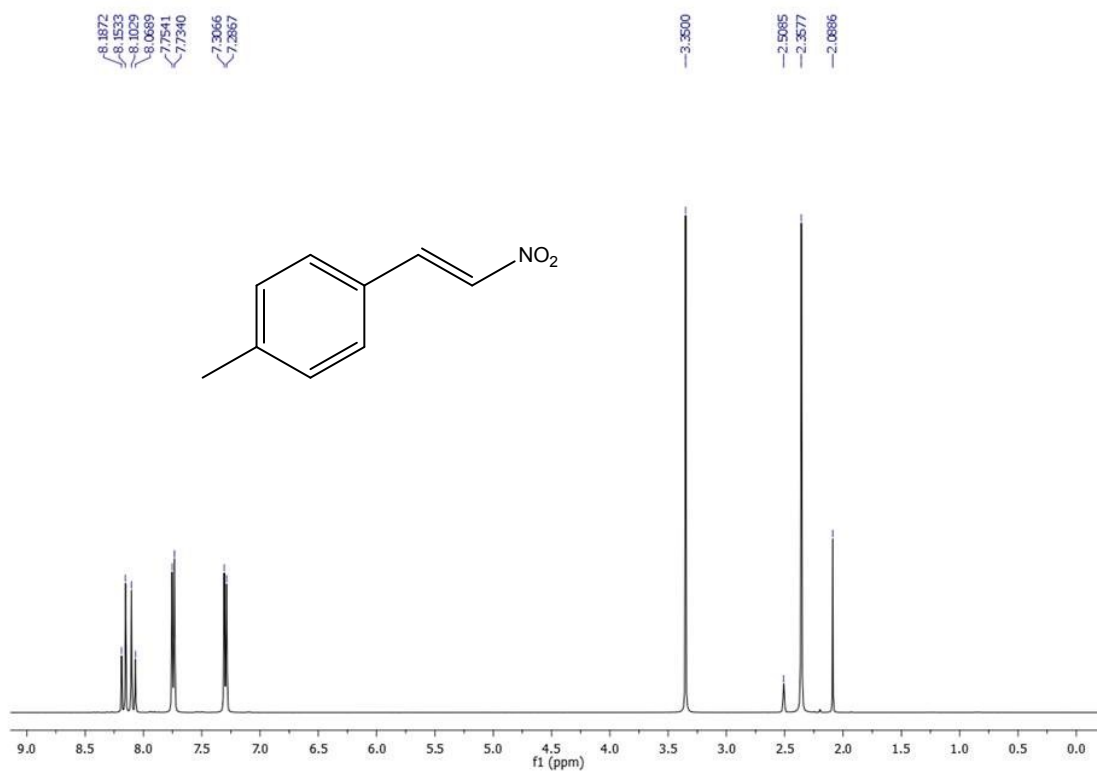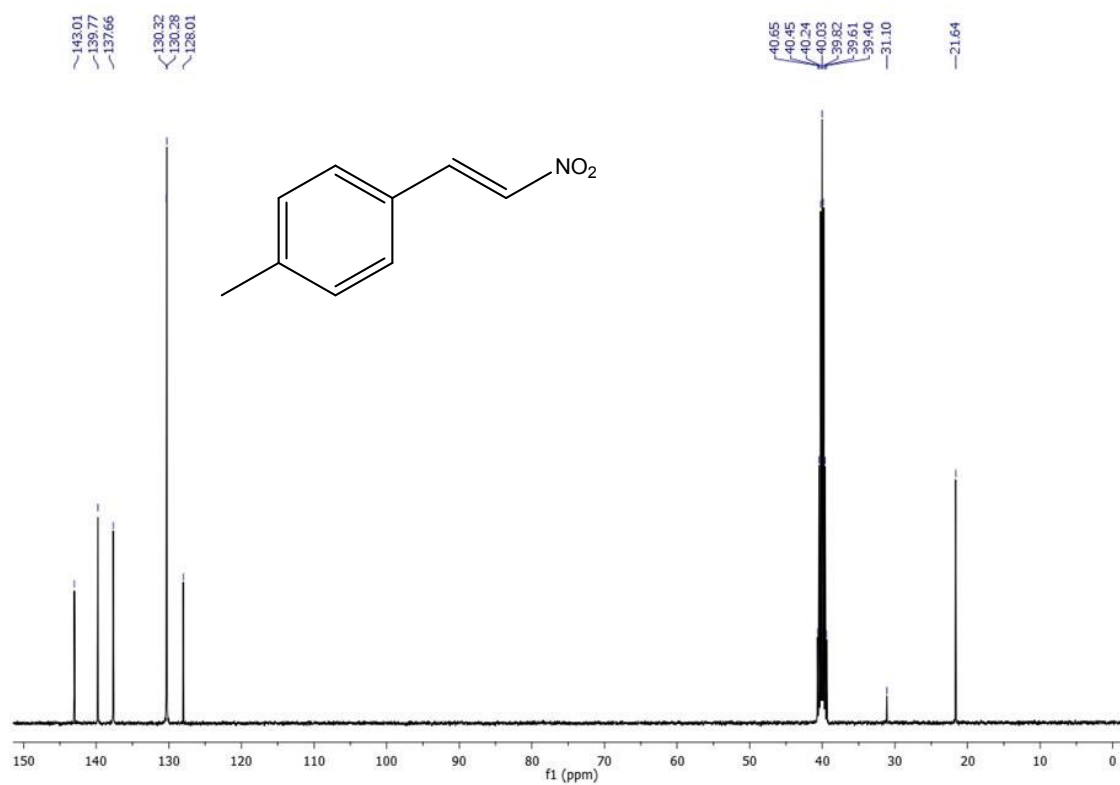**<sup>1</sup>H NMR and <sup>13</sup>C NMR for compound 2b**



## Supporting Information

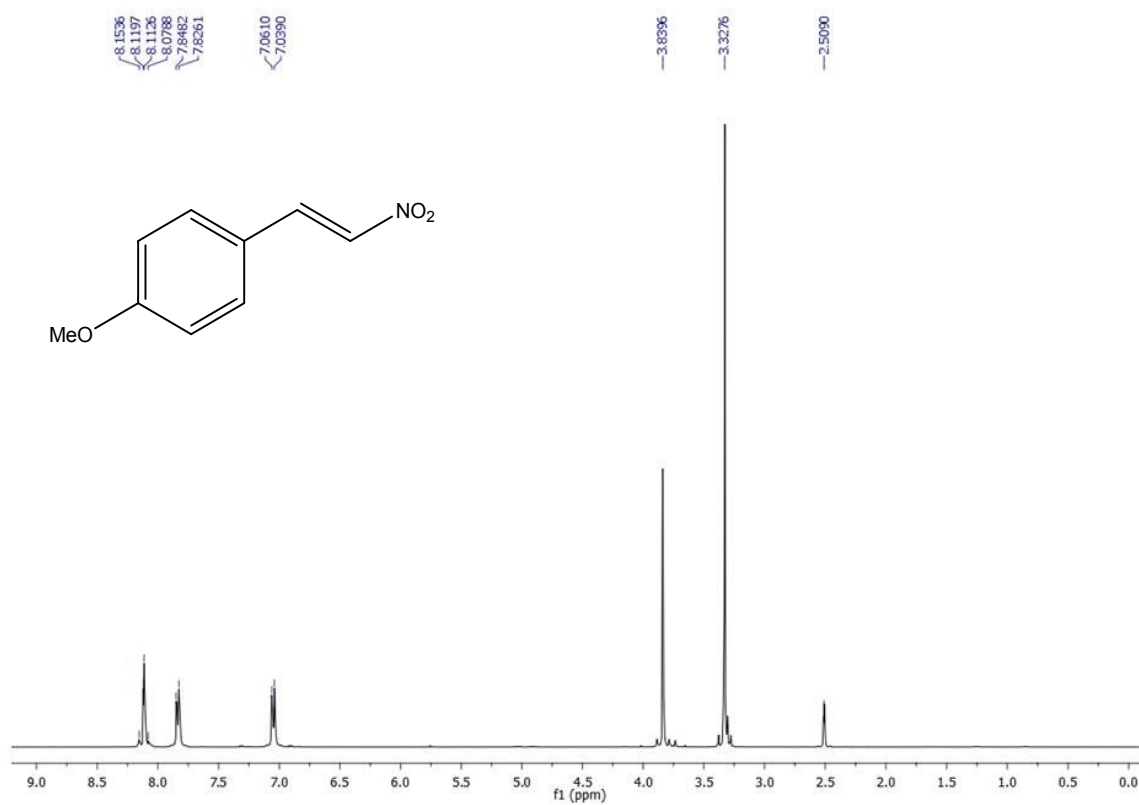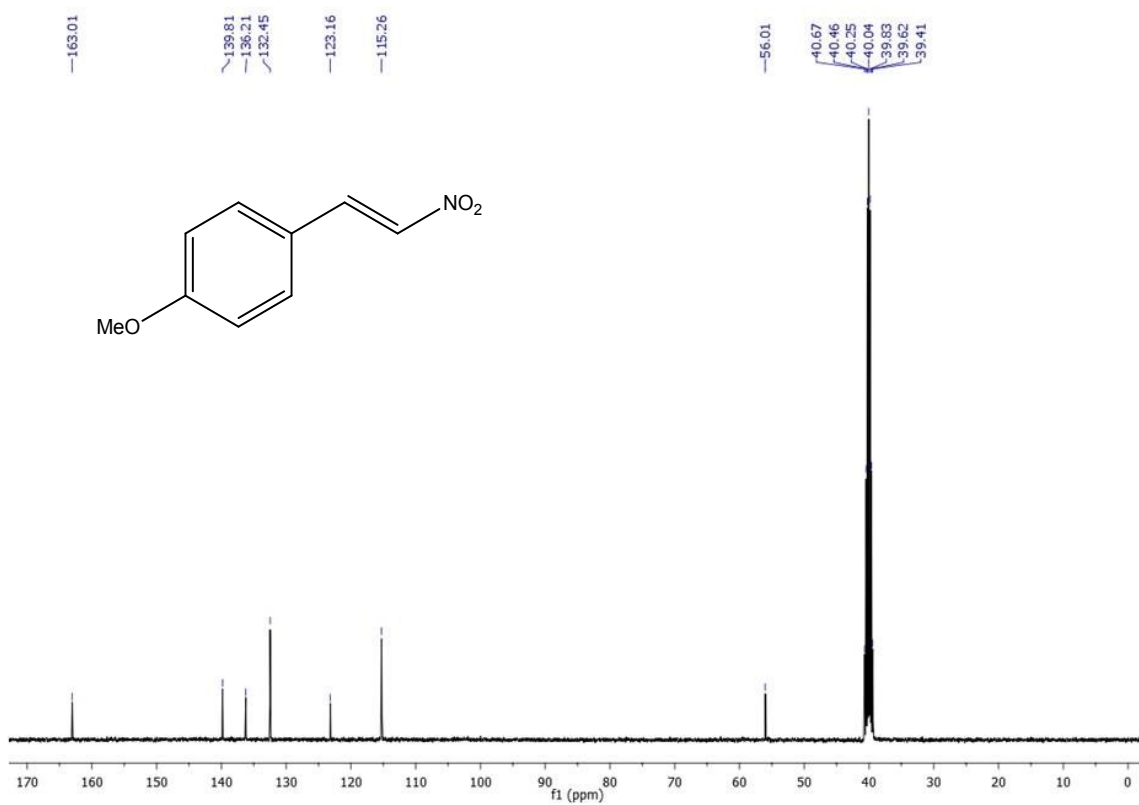

<sup>1</sup>H NMR and <sup>13</sup>C NMR for compound 2d

# Supporting Information

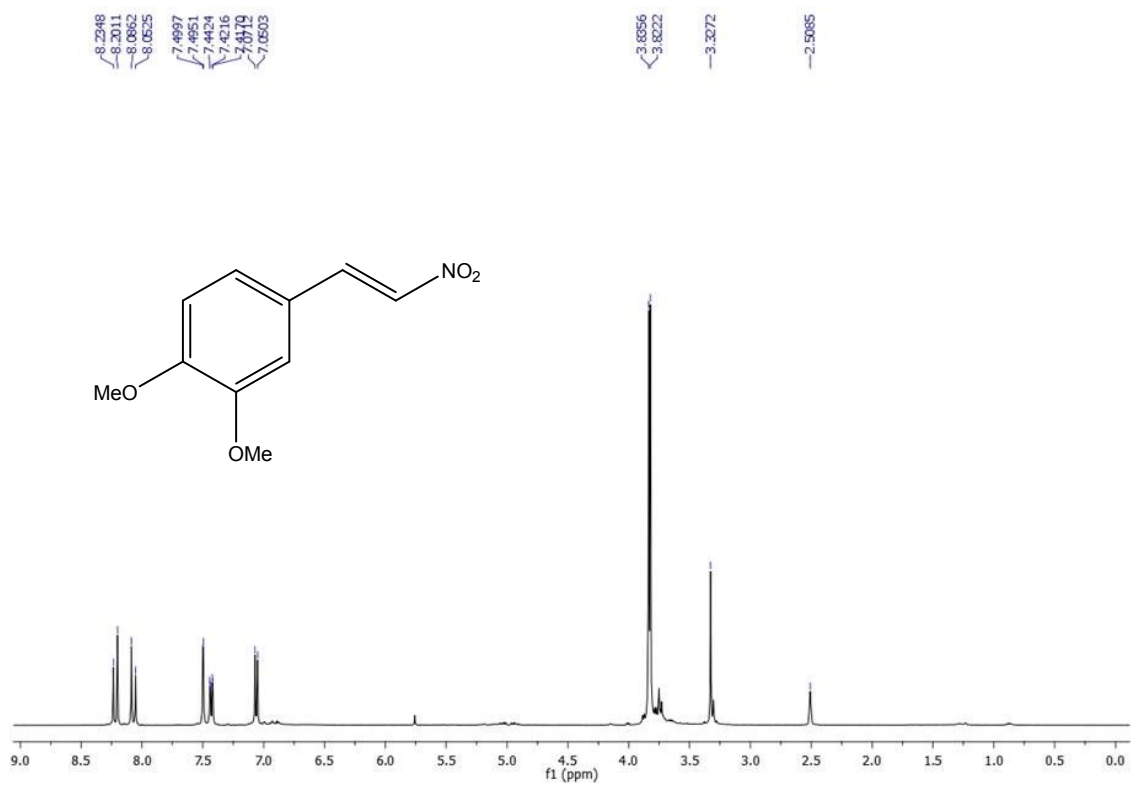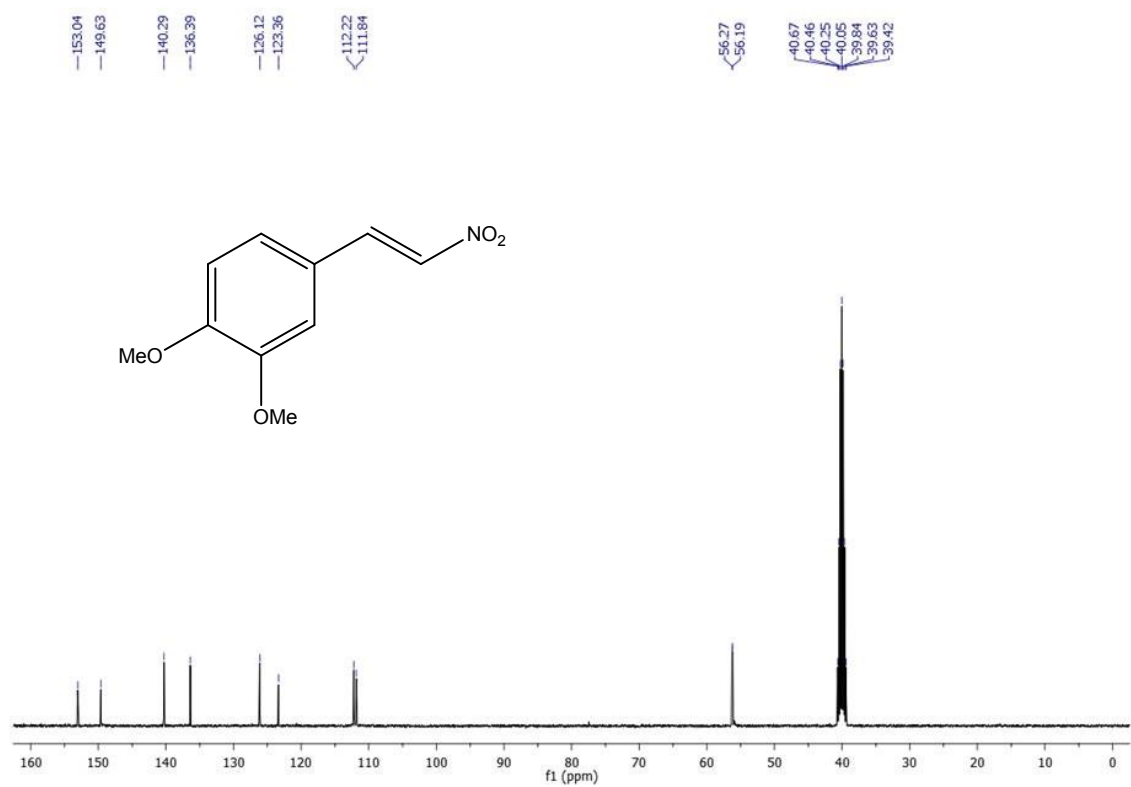

<sup>1</sup>H NMR and <sup>13</sup>C NMR for compound 2e

# Supporting Information

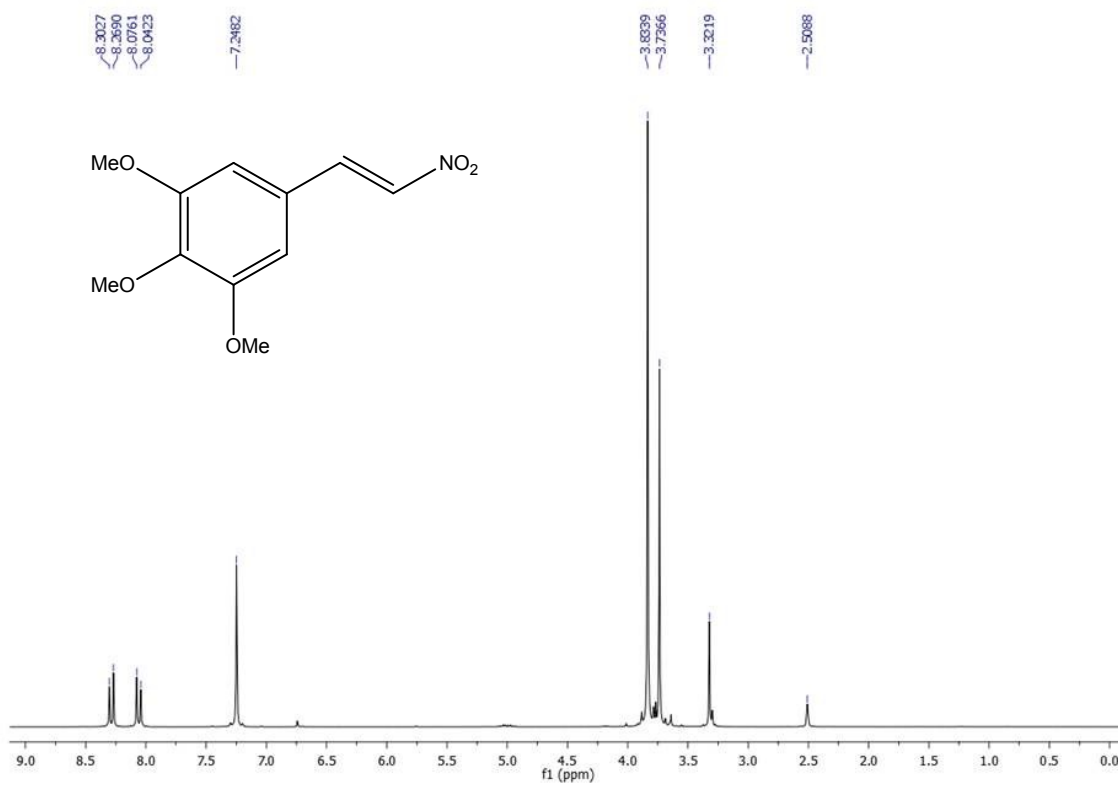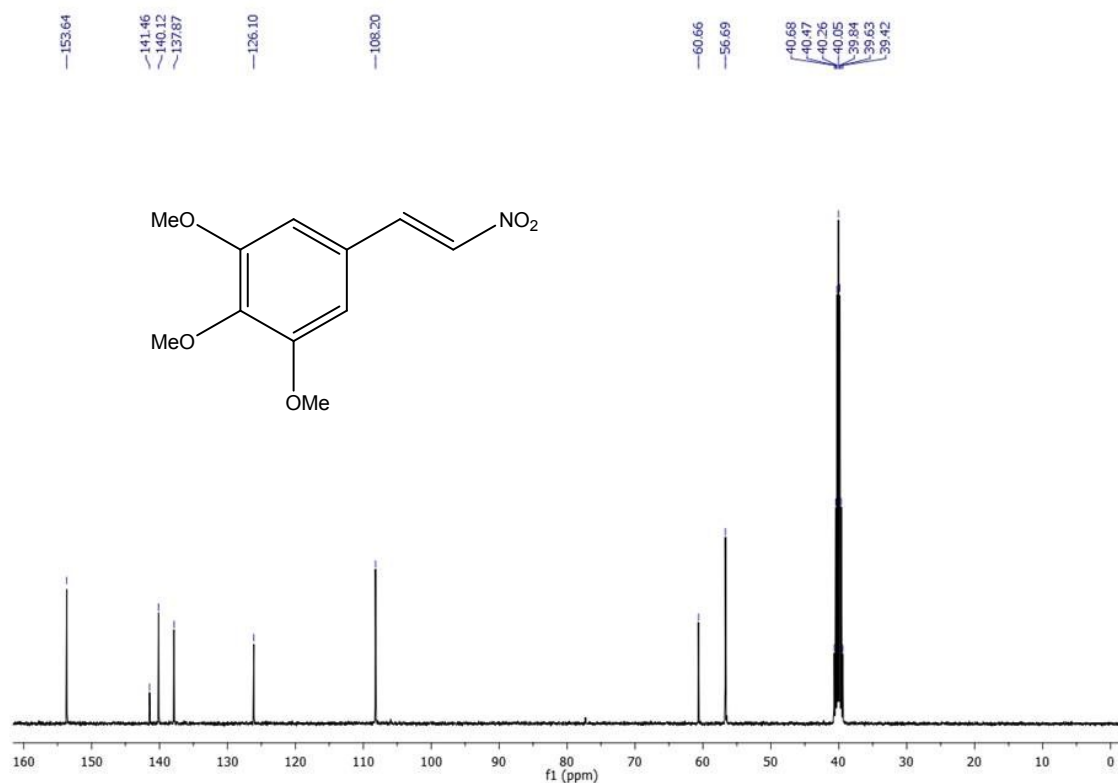

<sup>1</sup>H NMR and <sup>13</sup>C NMR for compound 2f

# Supporting Information

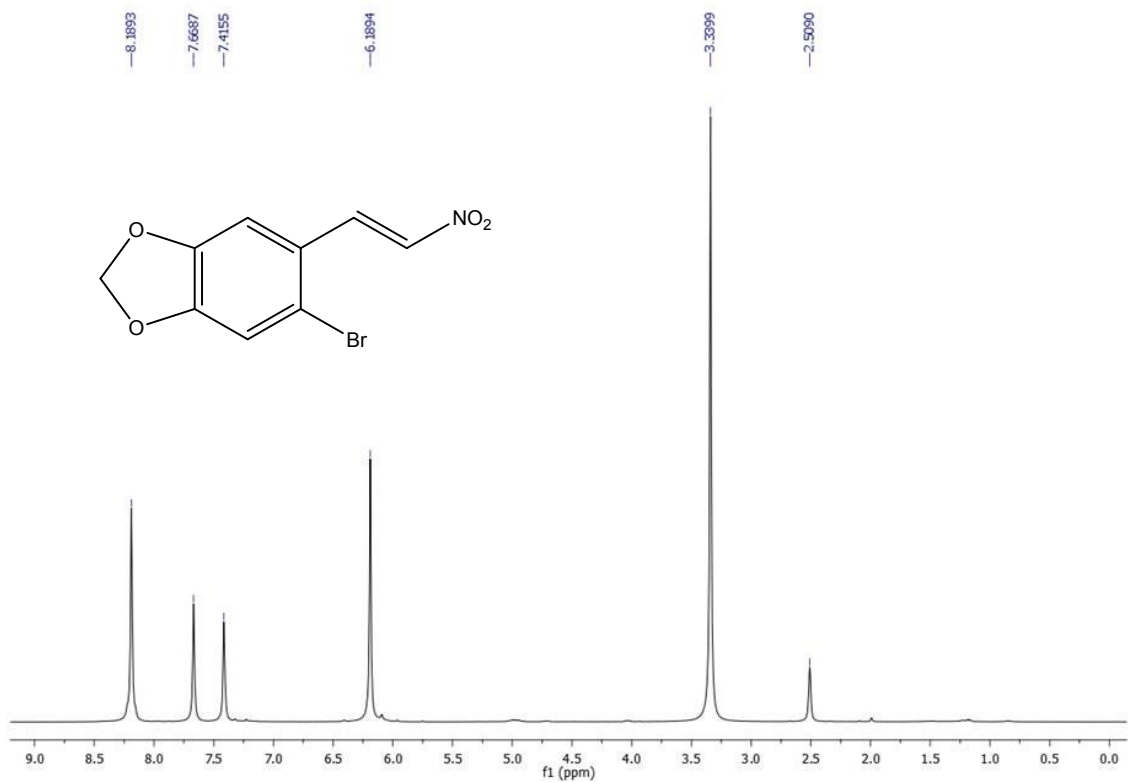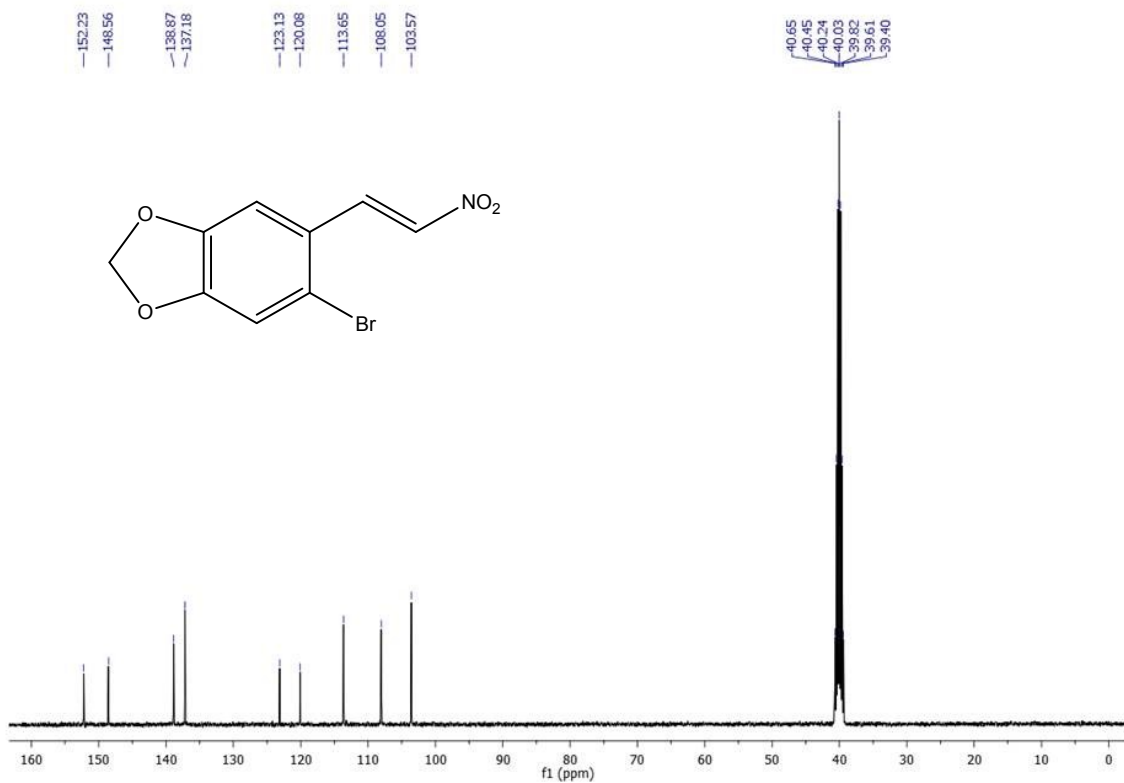

<sup>1</sup>H NMR and <sup>13</sup>C NMR for compound 2g



# Supporting Information

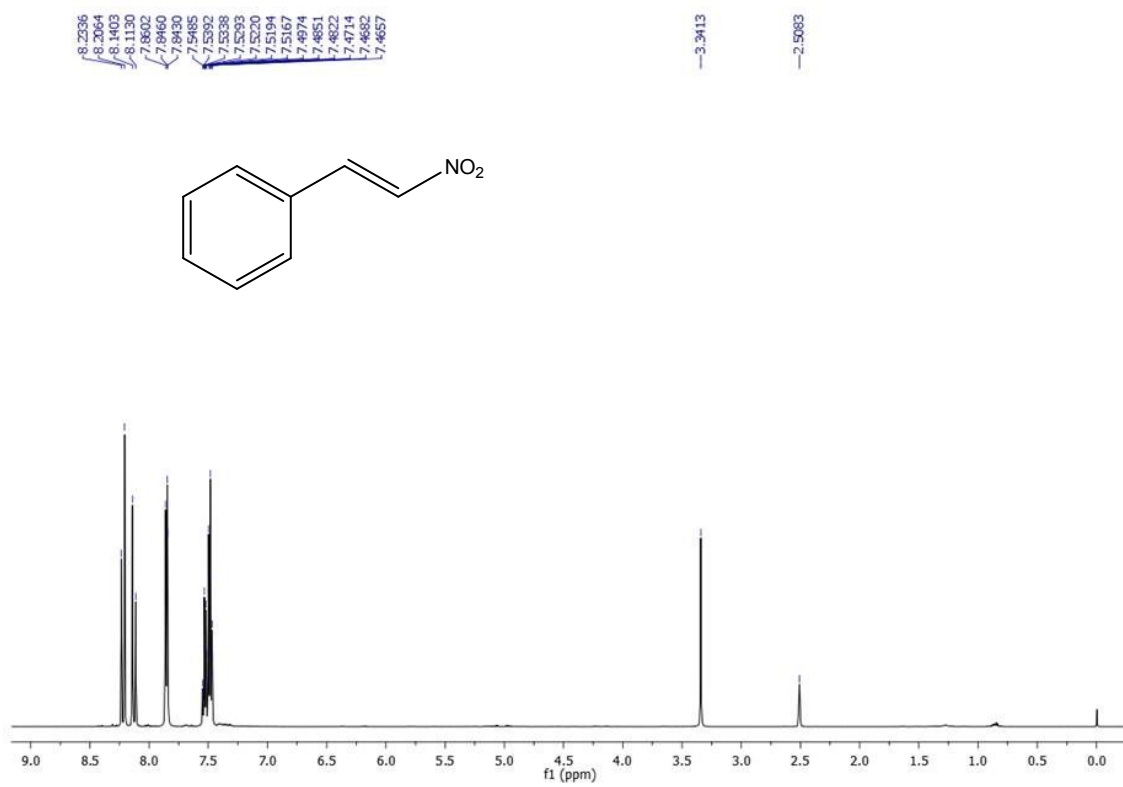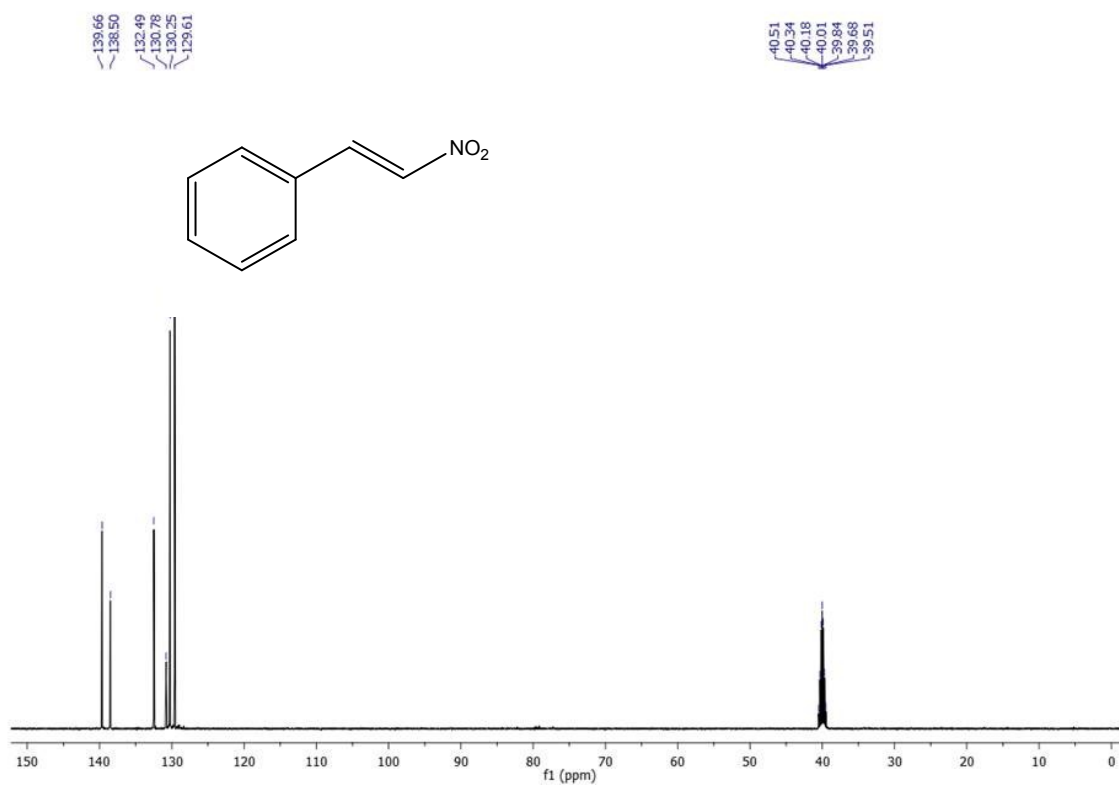

<sup>1</sup>H NMR and <sup>13</sup>C NMR for compound 2h

# Supporting Information

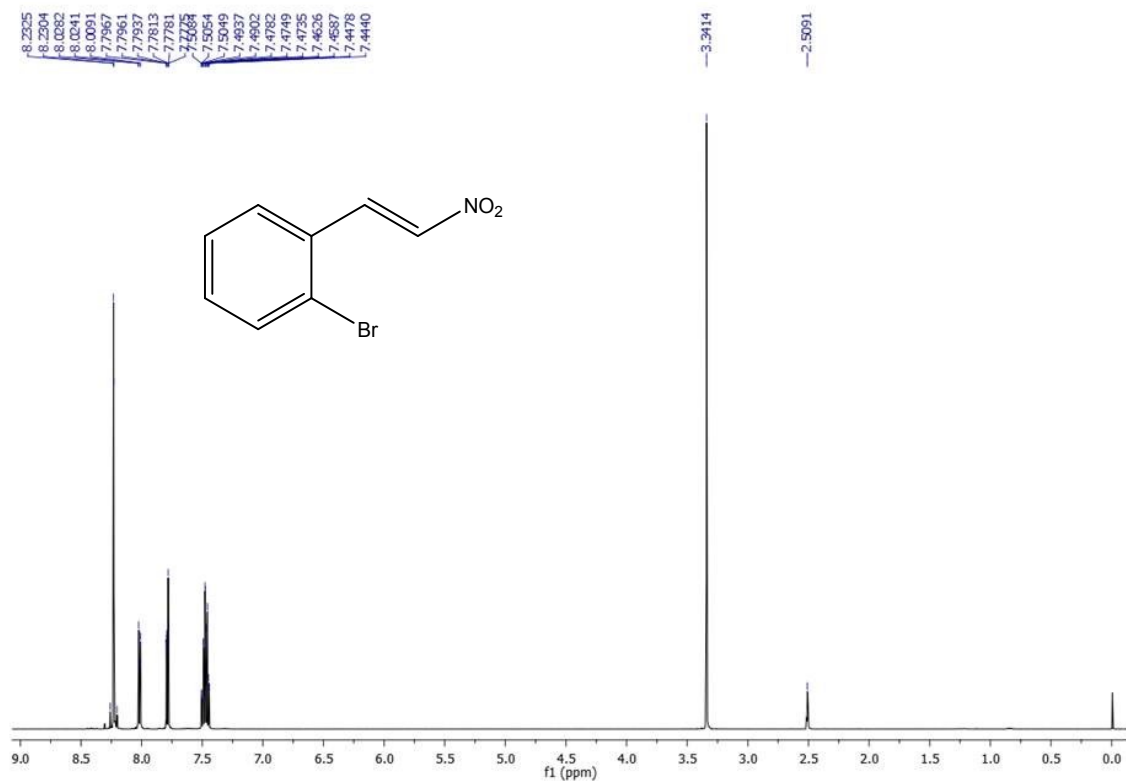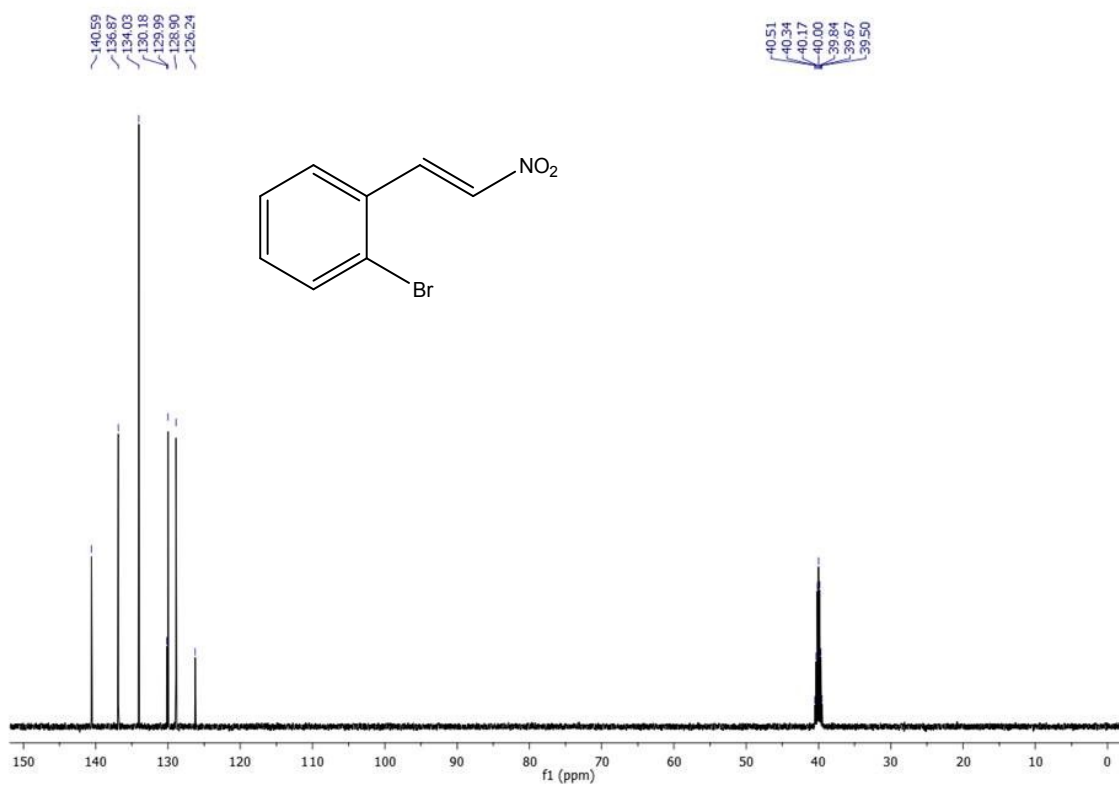

<sup>1</sup>H NMR and <sup>13</sup>C NMR for compound 2i

# Supporting Information

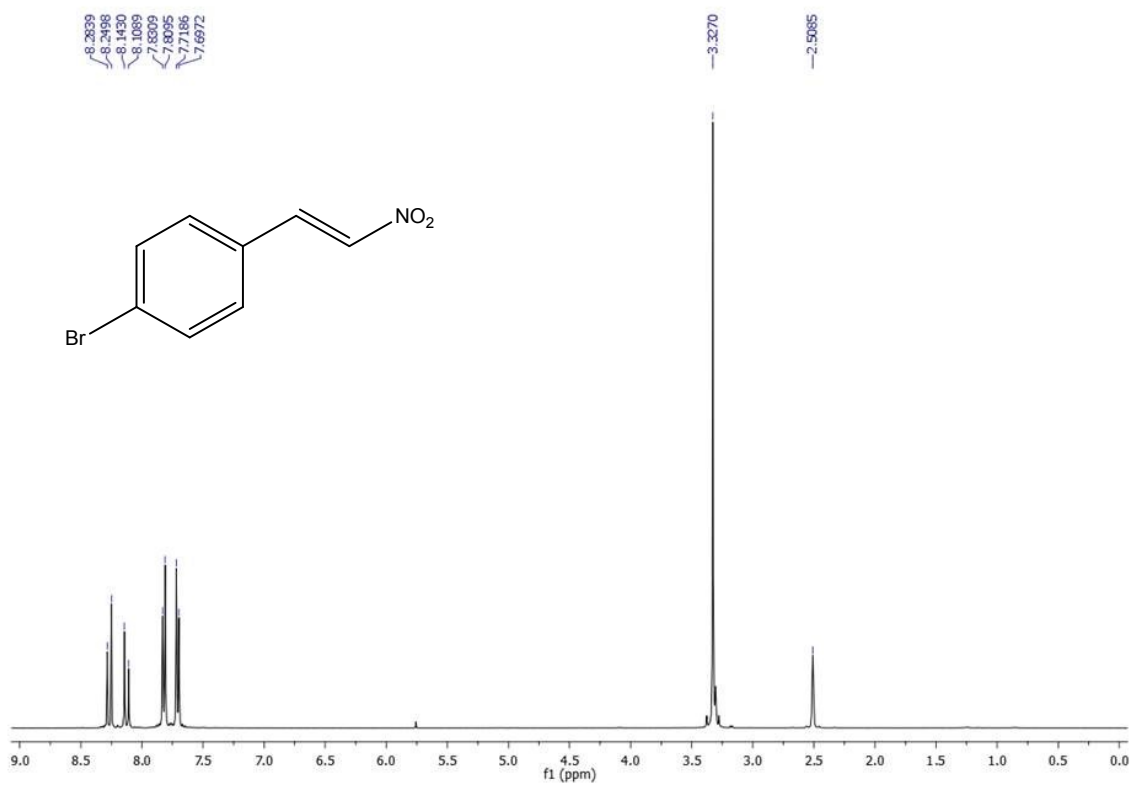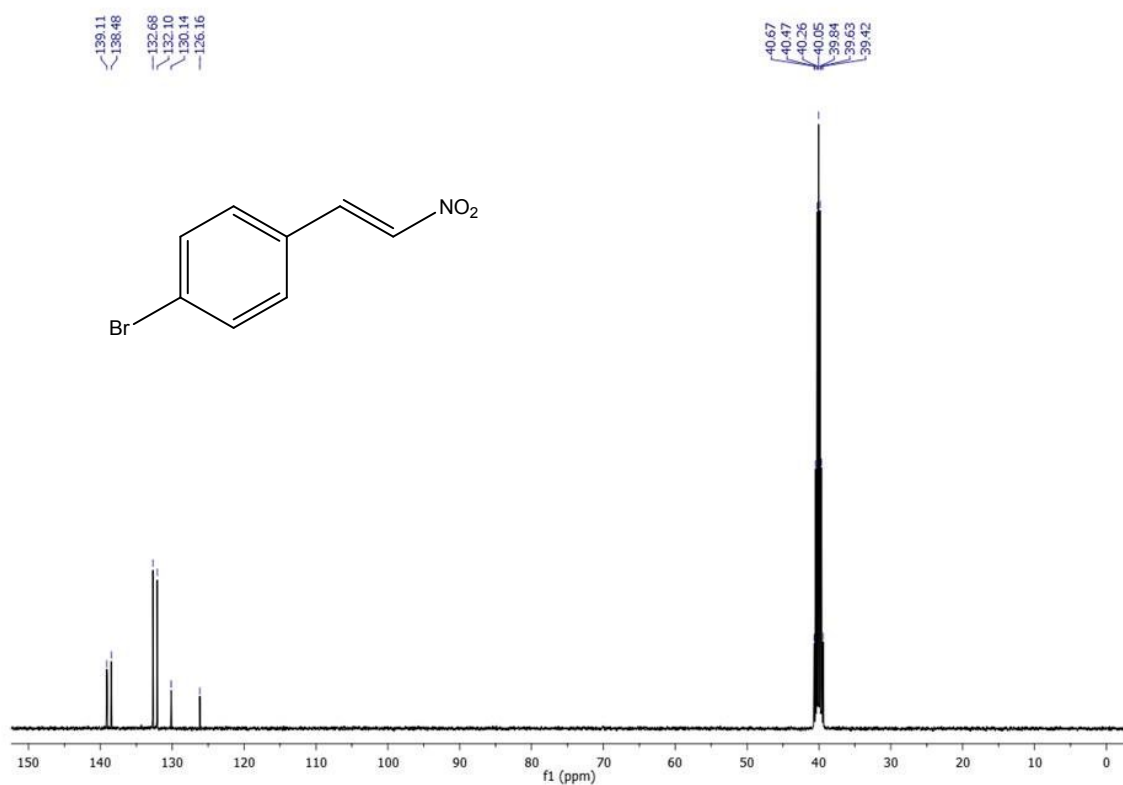

<sup>1</sup>H NMR and <sup>13</sup>C NMR for compound 2j

# Supporting Information

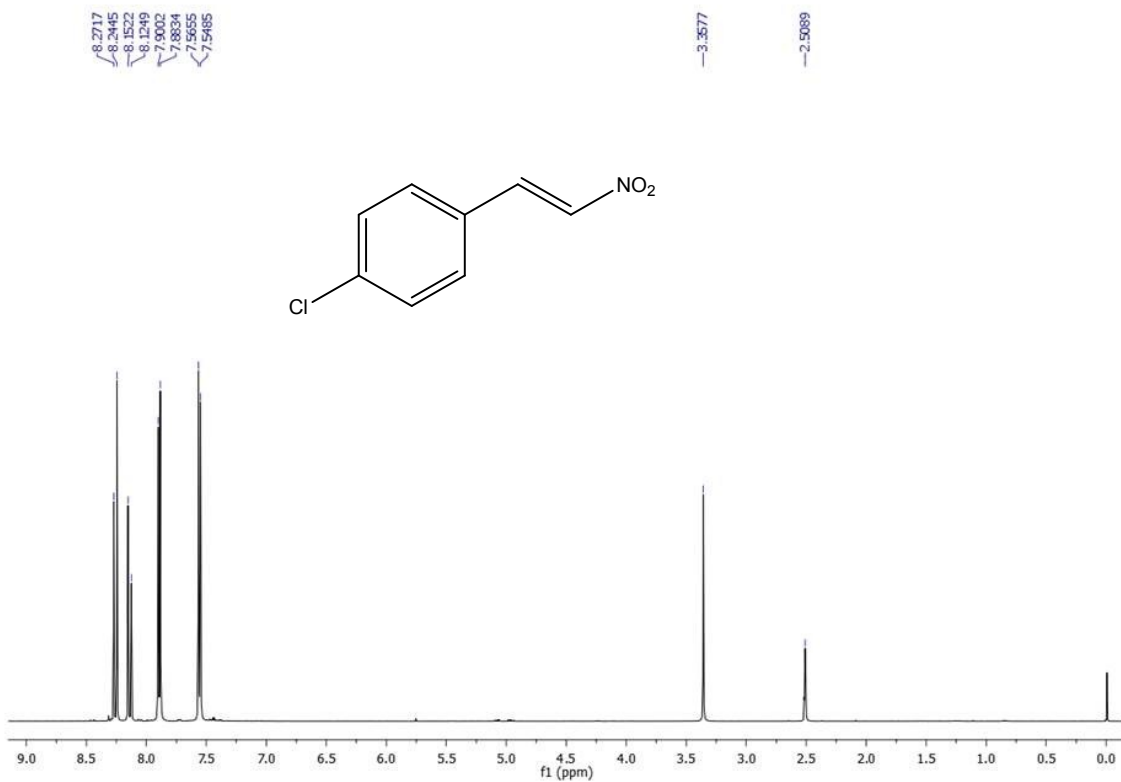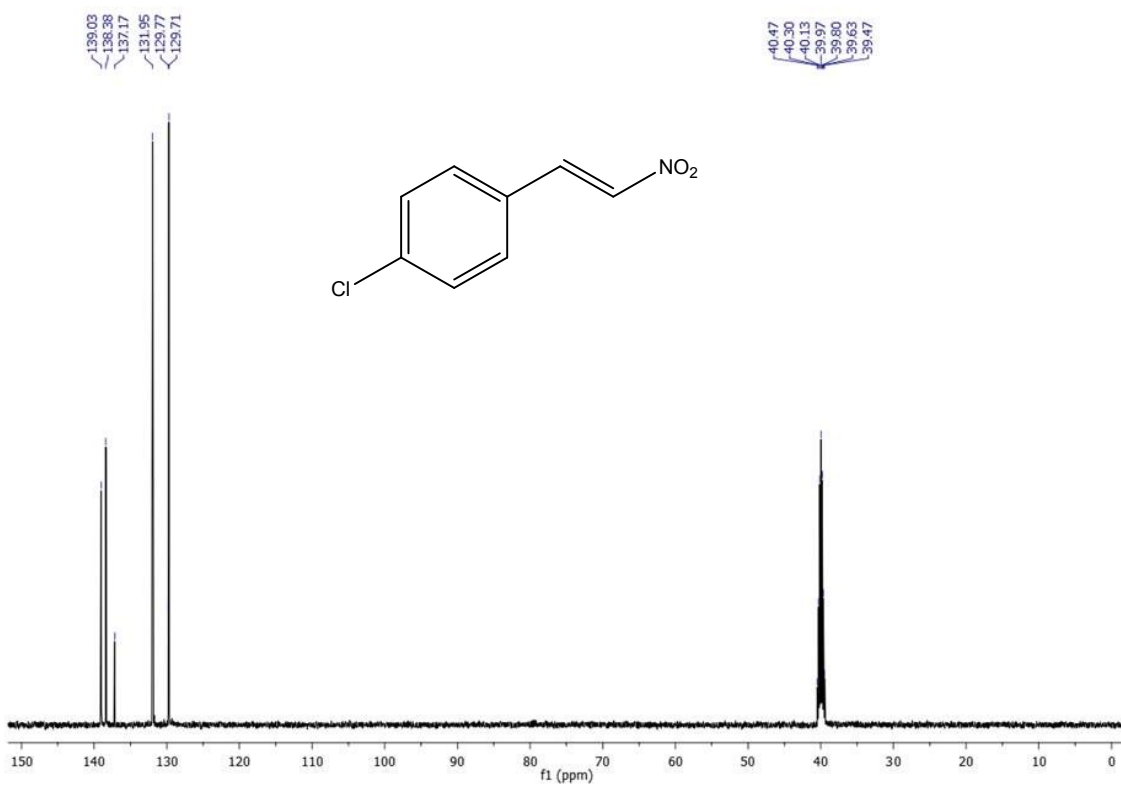

**<sup>1</sup>H NMR and <sup>13</sup>C NMR for compound 2k**

# Supporting Information

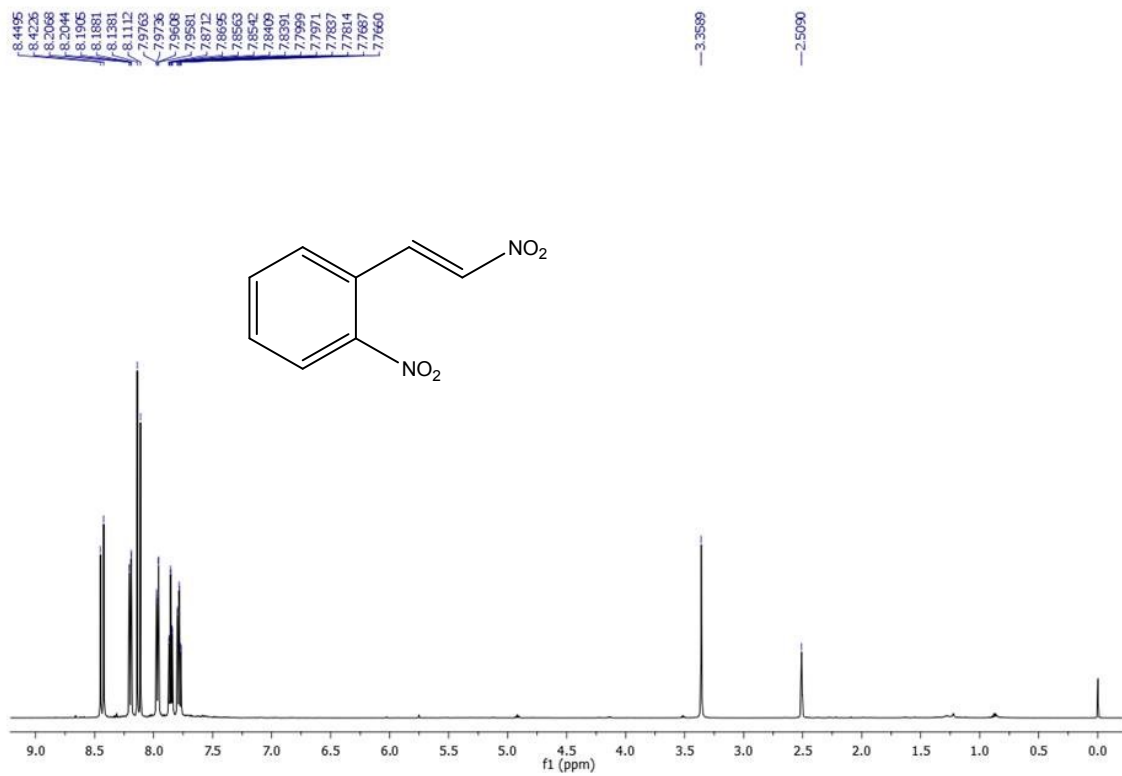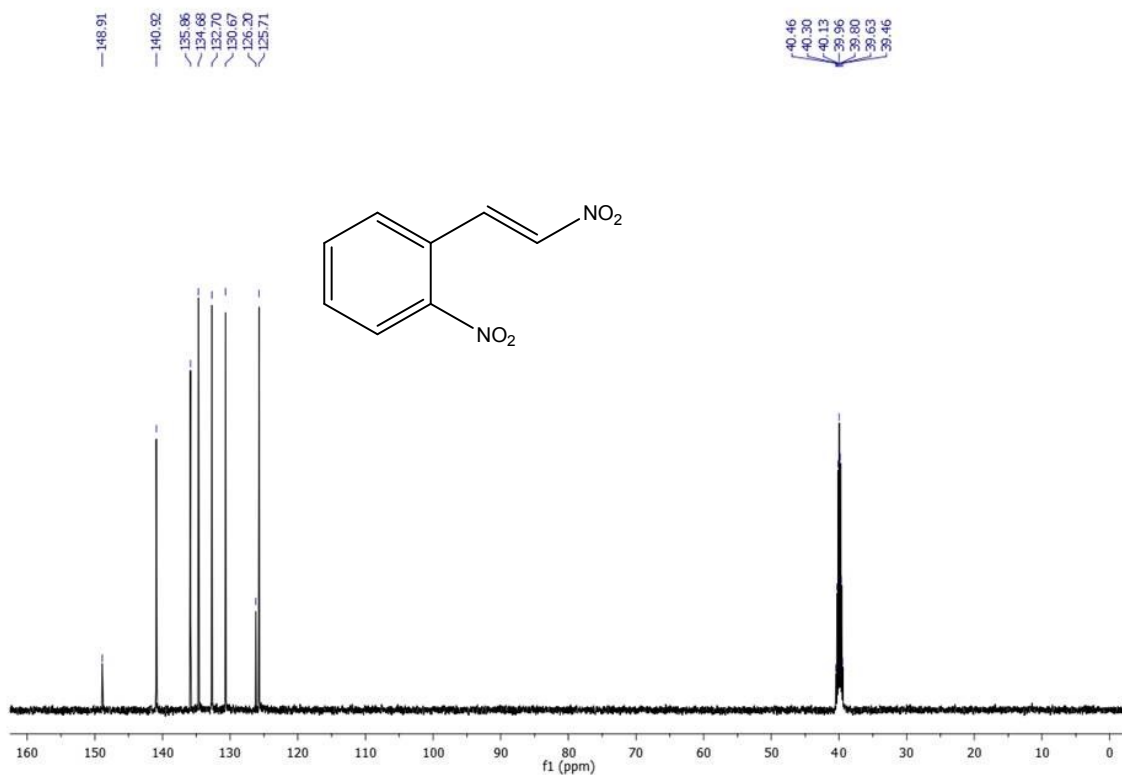

<sup>1</sup>H NMR and <sup>13</sup>C NMR for compound 2I

# Supporting Information

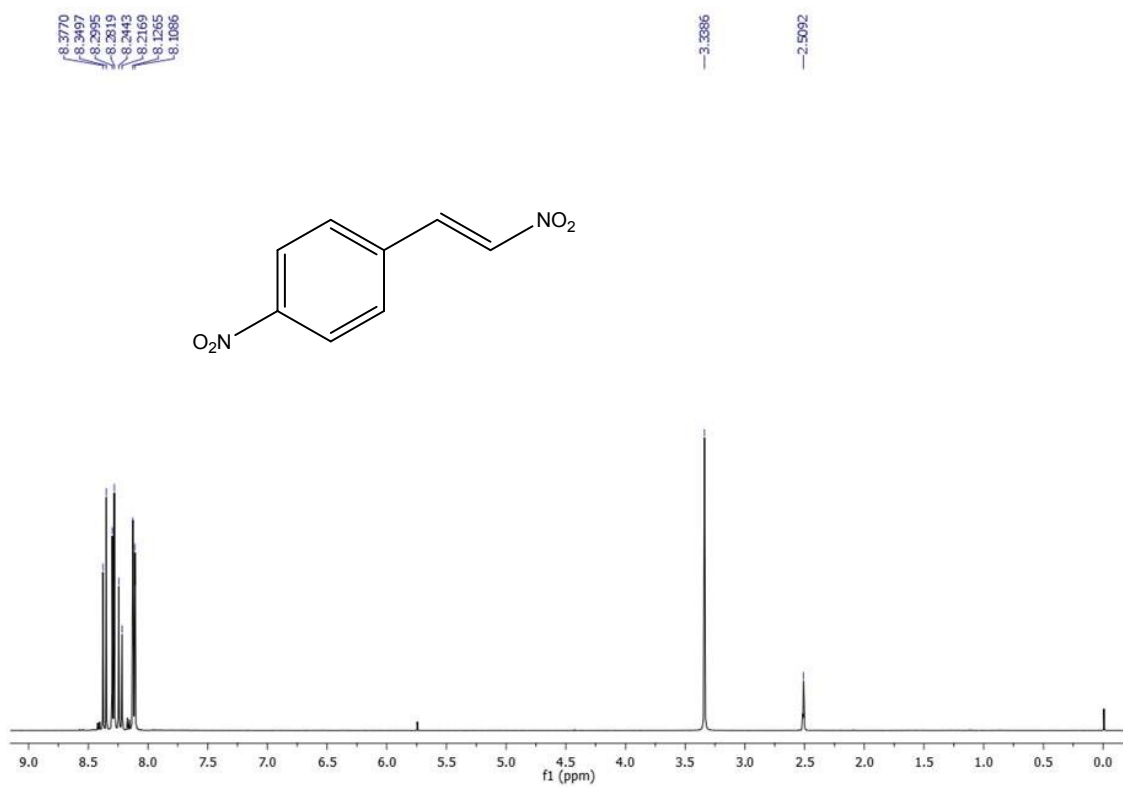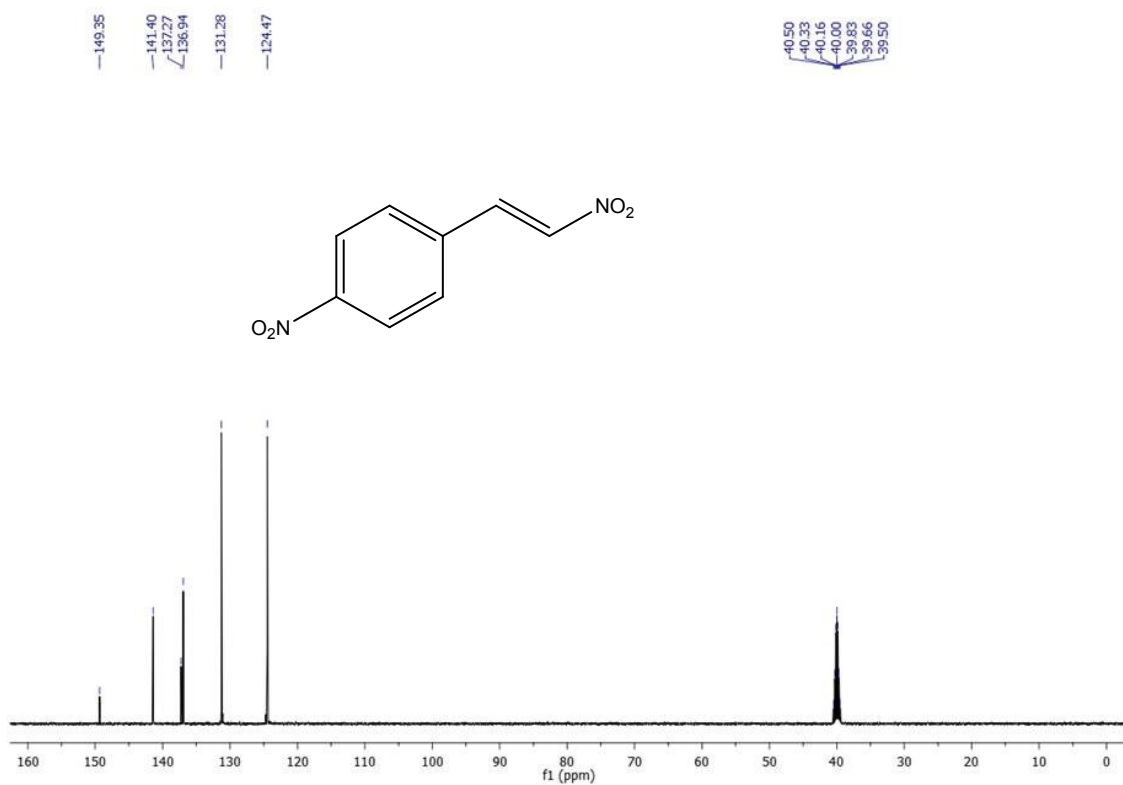

<sup>1</sup>H NMR and <sup>13</sup>C NMR for compound 2m

## Supporting Information

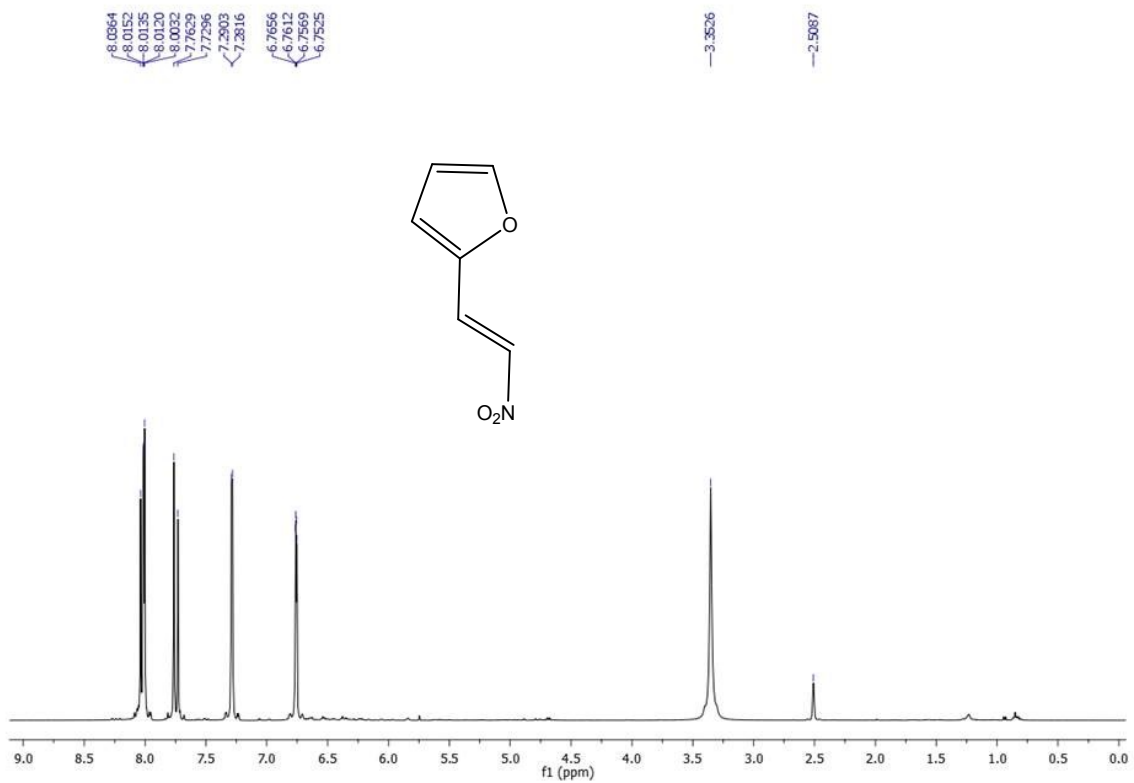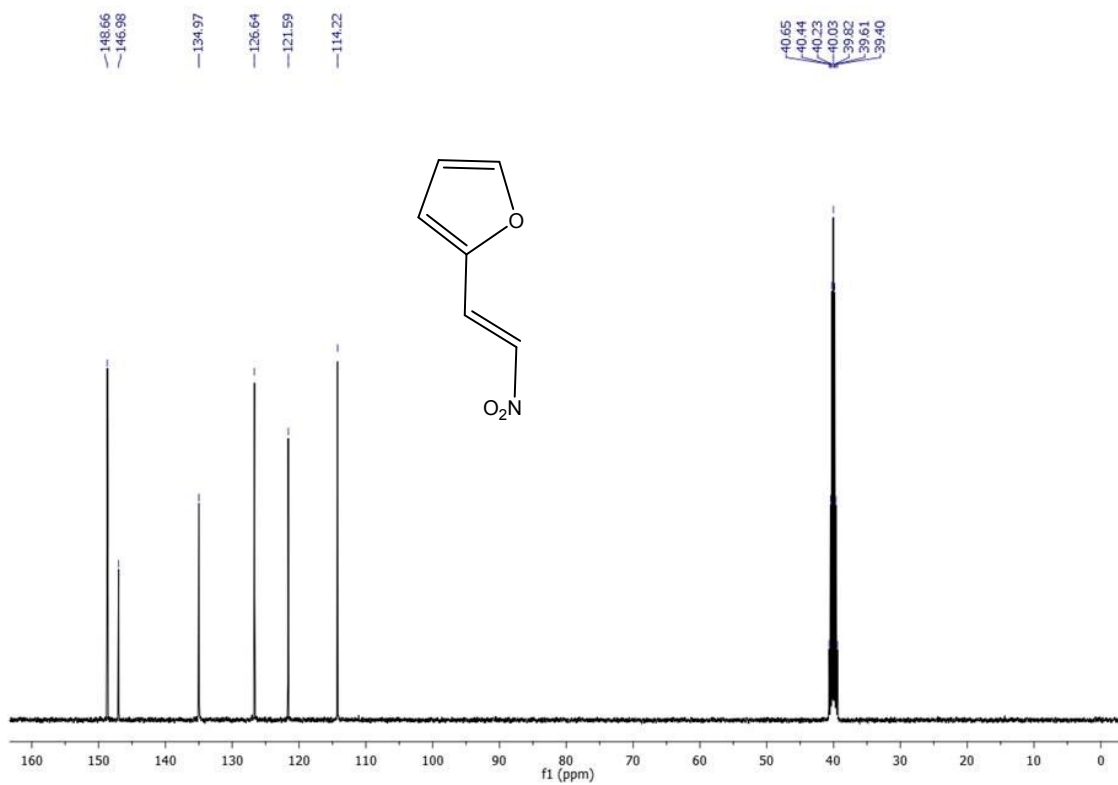

## 5. References

- 
- <sup>1</sup> G. E. Negrón, L. N. Palacios, D. Angeles, L. Lomas and R. Gavino, *J. Braz. Chem. Soc.*, 2005, **16**, 490.
  - <sup>2</sup> Y. Zhao, W. Li, M. Zhang, K. Tao, *Cat. Commun.*, 2002, **3**, 239.
  - <sup>3</sup> S. Sarkar, K. Bera, S. Jalal and U. Jana, *Eur. J. Org. Chem.*, 2013, 6055.
  - <sup>4</sup> J. Yang, J. Dong, X. Lü, Q. Zhang, W. Ding, X. Shi, *Chin. J. Chem.*, 2012, **30**, 2827.
  - <sup>5</sup> L. Rokhum, G. Bez, *Tetrahedron Lett.*, 2013, **54**, 5500.
  - <sup>6</sup> J. M. Lopchuk, R. P. Hughes, G. W. Gribble, *Org. Lett.*, 2013, **15**, 5218.
